# Supplementary material
Source: PubMed Central journal article supplement (PMC4117719)
Supplement: NIHMS591475-supplement-Graphical_Abstract.pdf [file NIHMS591475-supplement-Graphical_Abstract.pdf]

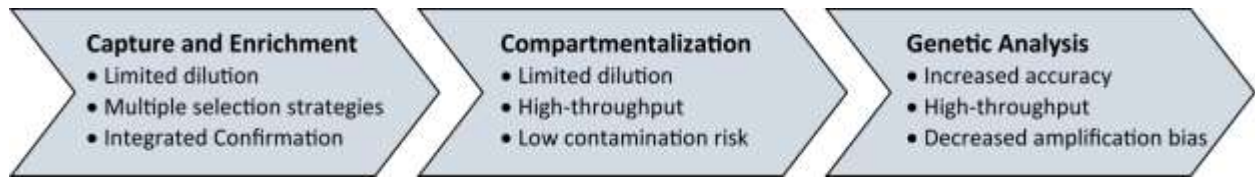

New tools are needed to study single-cell genetics, and a microfluidic approach offers unique advantages and challenges.
